# Supplementary material
Source: PubMed Central journal article supplement (PMC4031623)

Supplementary Information for  
**Knockdown of a zebrafish aryl hydrocarbon receptor repressor (*ahrra*) affects expression  
of genes related to photoreceptor development and hematopoiesis**

by

Neelakanteswar Aluru, Mathew J. Jenny, Mark E. Hahn

*Toxicological Sciences*

**Contents:**

**Supplementary Table S1.** AHRRa-MO: No effect on AHR, ARNT, or HIF gene expression.

**Supplementary Table S2.** AHRR-MO differential gene expression. List of significant genes.  
(Please see separate file: Table\_S2.xlsx)

**Supplementary Table S3.** List of eye-related genes differentially expressed  
by AHRRa-MO knockdown in zebrafish.

**Supplementary Figure S1.** Biological network of differentially expressed genes.

**Supplementary Figure S2.** Replicate experimental results confirming the effect of TCDD on  
AHRR-MO induced *arr3b* (A), *hbbe3* (B) and *mmp9* (C) gene expression changes.

### Supplementary Table S1.

No effect of AHRRa-MO on mRNA expression of AHR, ARNT, or HIF.

| ProbeName    | GeneName <sup>a</sup> | log2FC <sup>b</sup> | FC <sup>b</sup> | adj.p.Val |
|--------------|-----------------------|---------------------|-----------------|-----------|
| A_15_P120520 | ahr1a                 | 0.046               | 1.03            | 0.969     |
| A_15_P116264 | ahr2                  | 0.159               | 1.12            | 0.786     |
| A_15_P103538 | ahr2                  | -0.012              | 0.99            | 0.985     |
| A_15_P105040 | arnt2                 | 0.191               | 1.14            | 0.759     |
| A_15_P105424 | hif1 $\alpha$ b       | -0.031              | 0.98            | 0.966     |
| A_15_P120565 | hif1 $\alpha$ b       | -0.253              | 0.84            | 0.591     |
| A_15_P101004 | hif2 $\alpha$         | 0.210               | 1.16            | 0.845     |
| A_15_P101503 | hif3 $\alpha$         | -0.514              | 0.70            | 0.319     |
| A_15_P101062 | hif3 $\alpha$         | 0.482               | 1.40            | 0.392     |
| A_15_P108026 | hif3 $\alpha$         | -0.279              | 0.82            | 0.658     |
| A_15_P102540 | hif3 $\alpha$         | -0.057              | 0.96            | 0.938     |

<sup>a</sup> Other members of these gene subfamilies were not on the array.

<sup>b</sup> FC=fold change.

**Supplementary Table S3. List of eye-related genes differentially expressed by AHRRa-MO knockdown in zebrafish.**

| <b>Agilent Probe Name</b> | <b>Gene Name</b>                                                                         | <b>Gene Symbol</b> | <b>Fold Change</b> | <b>B-statistic</b> |
|---------------------------|------------------------------------------------------------------------------------------|--------------------|--------------------|--------------------|
| A_15_P115980              | Opsin 1 (cone pigments), short-wave-sensitive 1                                          | <i>opn1sw1</i>     | -7.24              | 13.53              |
| A_15_P107533              | Phosphodiesterase 6C, cGMP-specific, cone, alpha prime                                   | <i>pde6c</i>       | -8.09              | 13.30              |
| A_15_P114133              | Phosphodiesterase 6H, cGMP-specific, cone                                                | <i>pde6h</i>       | -10.09             | 12.54              |
| A_15_P117046              | Opsin 1 (cone pigments), medium-wave-sensitive, 1                                        | <i>opn1mw1</i>     | -7.35              | 12.35              |
| A_15_P106879              | Arrestin 3, retinal (X-arrestin)                                                         | <i>arr3b</i>       | -4.40              | 11.94              |
| A_15_P120294              | Retinal degradation slow 2                                                               | <i>rds2</i>        | -5.22              | 11.37              |
| A_15_P111532              | Guanine nucleotide binding protein (G protein), beta polypeptide 3                       | <i>gnb3</i>        | -5.58              | 11.16              |
| A_15_P121399              | Guanine nucleotide binding protein (G protein), alpha transducing activity polypeptide 2 | <i>gnat2</i>       | -7.08              | 10.98              |
| A_15_P107383              | Phosducin 2                                                                              | <i>pdcc2</i>       | -3.61              | 10.50              |
| A_15_P102875              | Retinal degradation slow 4                                                               | <i>rds4</i>        | -5.60              | 10.19              |
| A_15_P110693              | Retinal degradation slow 2                                                               | <i>rds2</i>        | -3.57              | 10.05              |
| A_15_P119413              | Opsin 1 (cone pigments), short-wave-sensitive 2                                          | <i>opn1sw2</i>     | -5.59              | 9.17               |
| A_15_P119429              | Opsin 1 (cone pigments), long-wave-sensitive, 2                                          | <i>opn1lw2</i>     | -2.98              | 8.72               |
| A_15_P111012              | Opsin 1 (cone pigments), long-wave-sensitive, 2                                          | <i>opn1lw2</i>     | -3.37              | 8.54               |
| A_15_P104674              | Retinol binding protein 4, like                                                          | <i>rbp4l</i>       | -3.26              | 8.48               |
| A_15_P104664              | Arrestin 3, retinal (X-arrestin), like                                                   | <i>arr3l</i>       | -5.21              | 8.32               |
| A_15_P108795              | Retinaldehyde binding protein 1b                                                         | <i>rlbp1b</i>      | -2.99              | 6.34               |
| A_15_P114820              | Recoverin                                                                                | <i>rcv1</i>        | -2.12              | 3.60               |
| A_15_P120962              | ATPase, Na <sup>+</sup> /K <sup>+</sup> transporting, beta 2b polypeptide                | <i>atp1b2b</i>     | -2.07              | 3.36               |
| A_15_P105587              | Prominin 1 b                                                                             | <i>prom1b</i>      | -2.28              | 2.98               |
| A_15_P104366              | RP9_HUMAN (Q8TA86) Retinitis pigmentosa 9 protein (Pim-1-associated protein)             | <i>PAP-1</i>       | -1.71              | 2.09               |
| A_15_P115534              | Retinal pigment epithelium-specific protein 65a                                          | <i>rpe65a</i>      | -1.83              | 1.28               |
| A_15_P102985              | GTP binding protein 4                                                                    | <i>gtpbp4</i>      | -1.65              | 1.01               |
| A_15_P117563              | Bardet-Biedl syndrome 5                                                                  | <i>bbs5</i>        | -1.75              | 0.35               |
| A_15_P109667              | Crystallin, gamma M2c                                                                    | <i>crygm2c</i>     | 2.18               | 1.12               |

**Supplemental Figure S1. Biological network of differentially expressed genes.**

All the differentially expressed genes from the AHRRa-MO group were analyzed for functional association using the STRING database and statistically significant networks were identified using jActiveModules v2.23. Nodes are colored based on the expression values.

**Supplemental Figure S2. Replicate experimental results confirming the effect of TCDD on AHRR-MO induced *arr3b* (A), *hbbe3* (B) and *mmp9* (C) gene expression changes.**

Beta-actin was used as an internal standard. The Delta-Delta Ct method was used to determine the fold-change in gene expression. Values represent mean+S.D. (Two-way ANOVA; n=3).

Bonferoni post-hoc test was used for determining statistical significance. <sup>a</sup> p≤0.05 TCDD versus DMSO; \*p≤0.05 AHRRa-MO group versus no-MO treatment.



Figure S2.

**A**

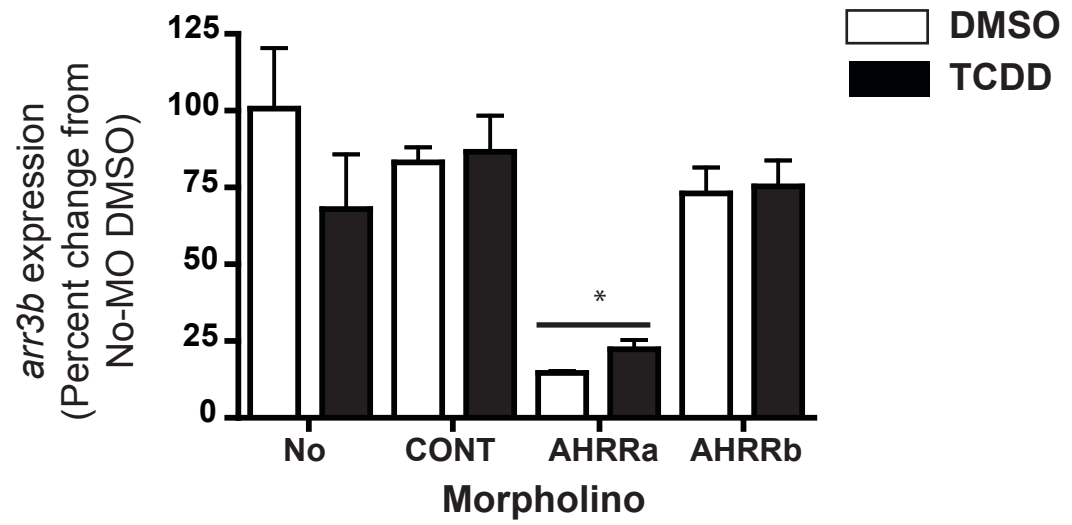

**B**

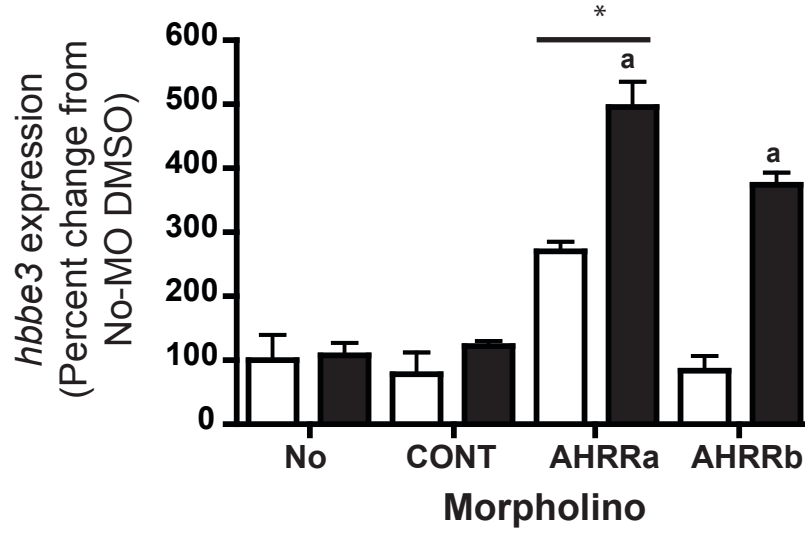

**C**

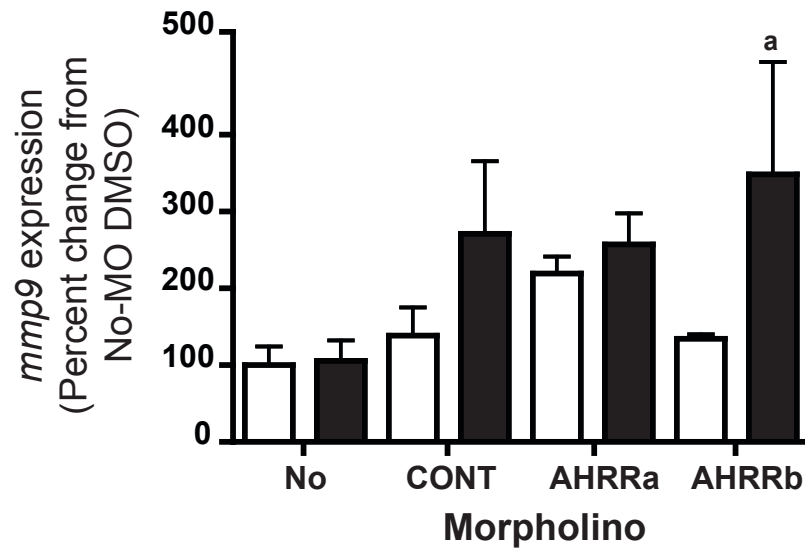

Supplement: supp_kfu052_toxsci-14-0035-File006.pdf [file supp_kfu052_toxsci-14-0035-File006.pdf]
